# Supplementary material for: Studies of the isomerization and photophysical properties of a novel 2,2′:6′,2′′-terpyridine-based ligand and its complexes
Source: Royal Society of Chemistry journal article supplement (doi:10.1039/c1dt10752f), 2011-01-01
Supplement: c1dt10752f.pdf [file c1dt10752f.pdf]

# Supporting Information For

## Studies of The Isomerization and Photophysical Properties of a Novel Ligand based on 2,2':6',2''-Terpyridine and its Complexes

*Dongmei Li,<sup>a,b</sup> Qiong Zhang,<sup>a</sup> Peng Wang,<sup>a</sup> Jieying Wu,<sup>a</sup> Yuhe Kan,<sup>c</sup> Yupeng Tian,<sup>\*, a,d,e</sup> Hongping Zhou,<sup>\*,a</sup> Jiaxiang Yang,<sup>a</sup> Xutang Tao,<sup>c</sup> and Minhua Jiang<sup>d</sup>*

<sup>a</sup> Department of Chemistry, Anhui Province Key Laboratory of Functional Inorganic Material Chemistry, Anhui University, Hefei, 230039, P. R. China. Fax: +86-551-5107304; Tel: +86-551-5108151;

<sup>b</sup> Henan Electric Power Research Institute, Zhengzhou, 450052, P. R. China.

<sup>c</sup> Department of Chemistry, Jiangsu Province Key Laboratory for Chemistry of Low-Dimensional Materials, Huaiyin Teachers College, Huaian 223001 P. R. China. E-mail: yhkan@yahoo.cn.

<sup>d</sup> State Key Laboratory of Crystal Materials, Shandong University, Jinan, 250100, P. R. China.

<sup>e</sup> State Key Laboratory of Coordination Chemistry, Nanjing University, Nanjing, 250100, P. R. China.

\*Corresponding author: Yupeng Tian, E-mail: [yptian@ahu.edu.cn](mailto:yptian@ahu.edu.cn); Hongping Zhou, E-mail: [zhpzhp@263.net](mailto:zhpzhp@263.net)

## Experimental section

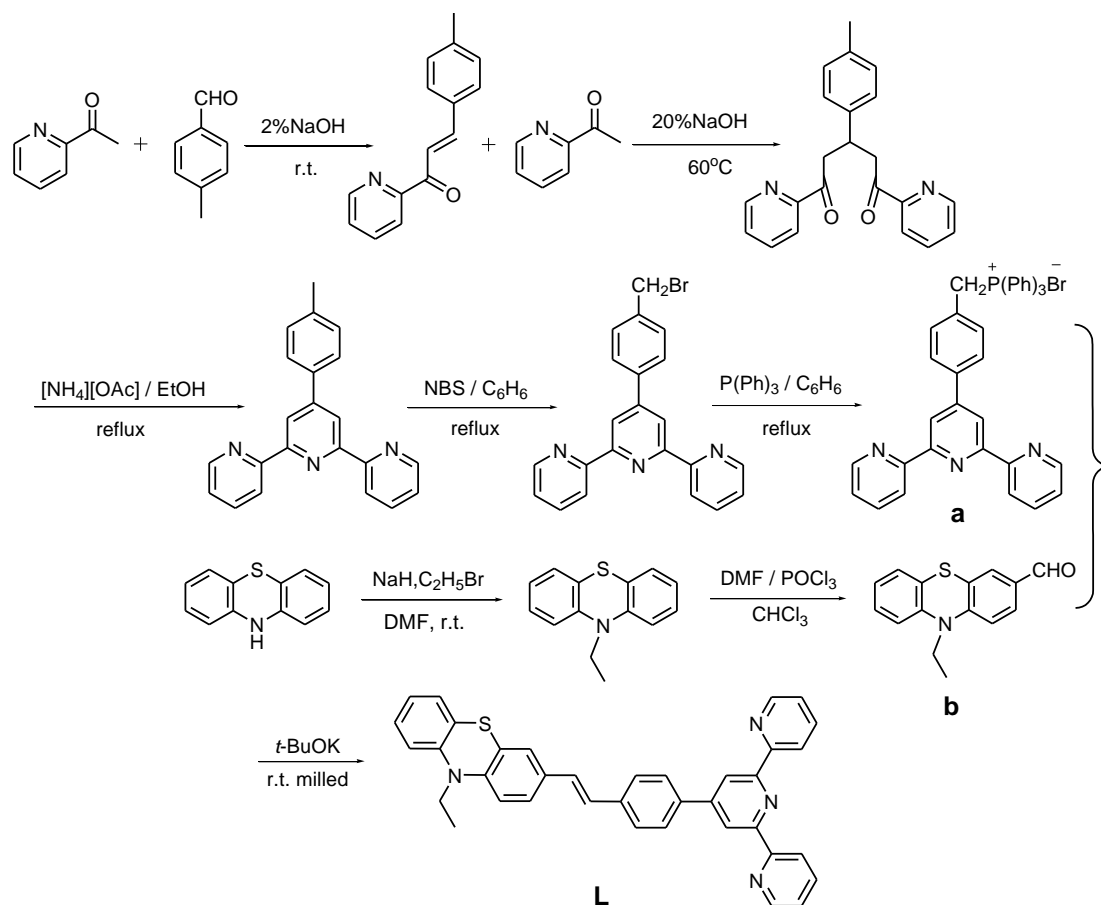

Scheme S1. Synthetic routes of **L**.

**Materials and Apparatus.** All solvents were dried and purified by usual methods. Elemental analysis was performed with a Perkin–Elmer 240 analyzer. IR spectra ( $4000\text{--}400\text{ cm}^{-1}$ ), as KBr pellets, were recorded on a Nicolet FT–IR 170 SX spectrophotometer. The mass spectra were obtained on a Micromass GCT–MS Spectrometer.  $^1\text{H}$  and  $^{13}\text{C}$  NMR spectra were performed on Bruker 400 spectrometer with TMS as the internal standard. Thermogravimetric analysis (TGA) analysis was recorded with a Perkin–Elmer Prisma–1 DMDA–V1 analyzer in an atmosphere of nitrogen at a heating rate of  $10\text{ }^\circ\text{C}\cdot\text{min}^{-1}$ .

**Optical measurements.** The OPA spectra were measured on a UV–3600 Spectrophotometer. The OPEF measurements were performed using a F–2500 Fluorescence Spectrophotometer. The OPA and OPEF of **L** were measured in six solvents with the concentration of  $1.0 \times 10^{-5}$  M, while those of the complexes were measured in DMF dilute solutions ( $1.0 \times 10^{-5}$  M). The third-order nonlinear optical (NLO) properties of all the compounds were studied by the Z-scan technique under an open aperture configuration with 532 nm laser pulses of 18 ns using DMF dilute solutions ( $1.5 \times 10^{-4}$  M).

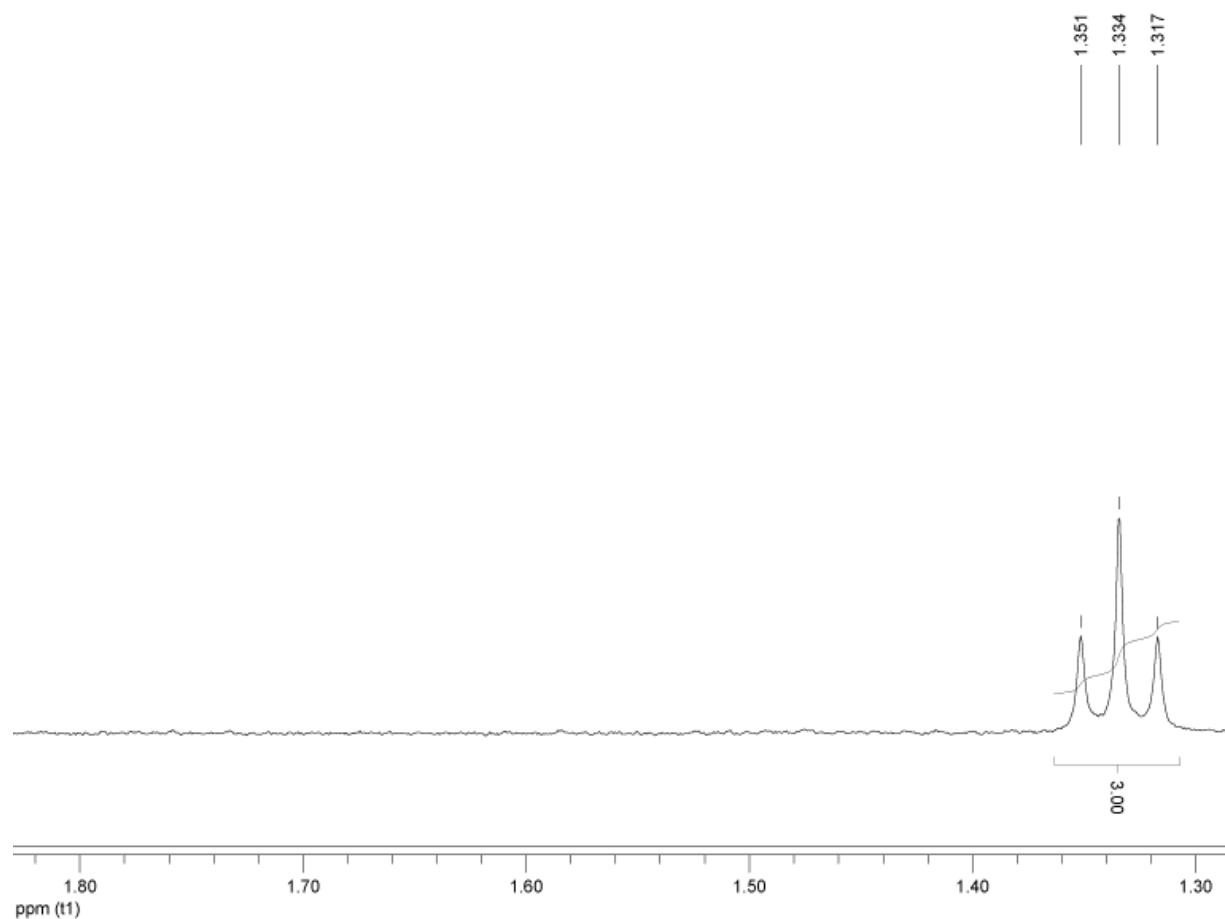

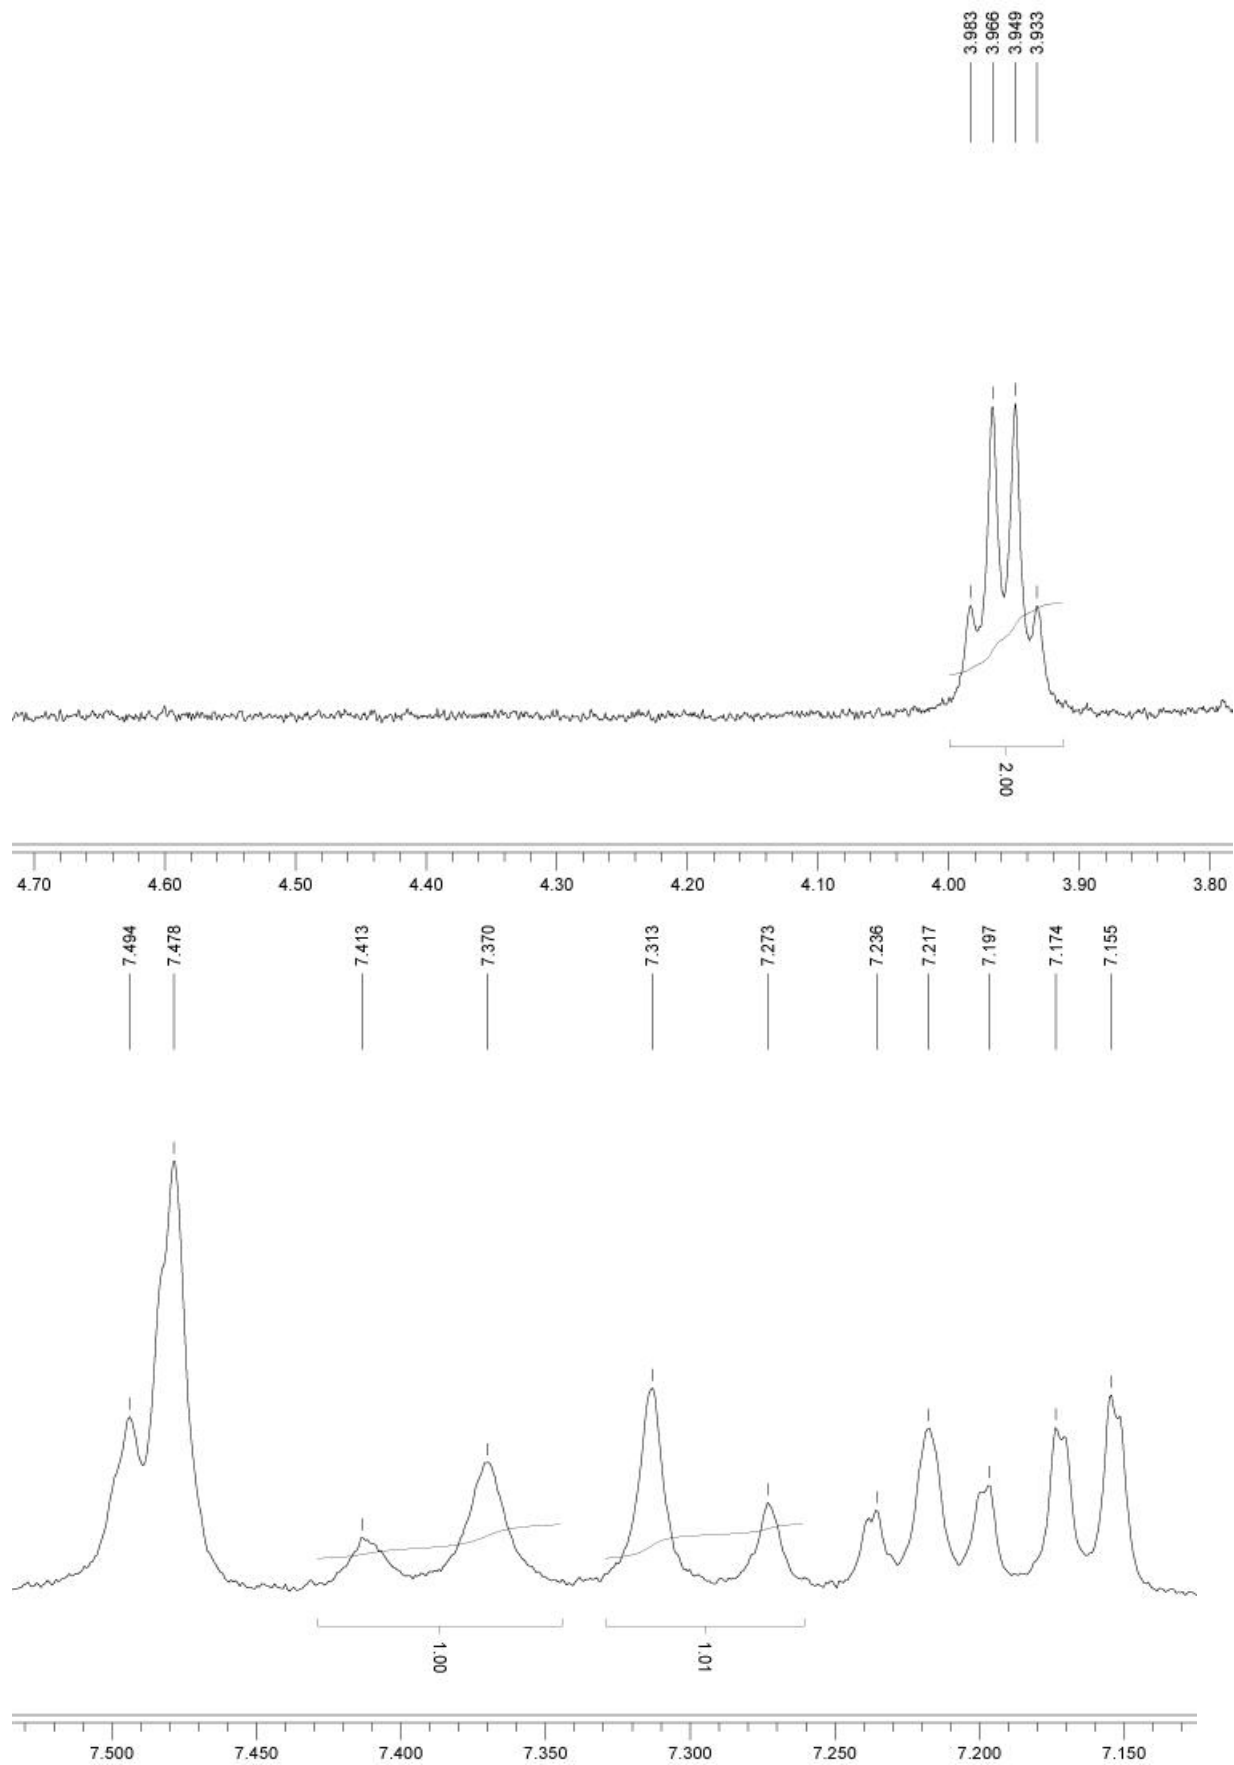

**Fig. S1.**  $^1\text{H}$  NMR spectra of **6** measured immediately after its dissolution in  $d_6$ -DMSO.

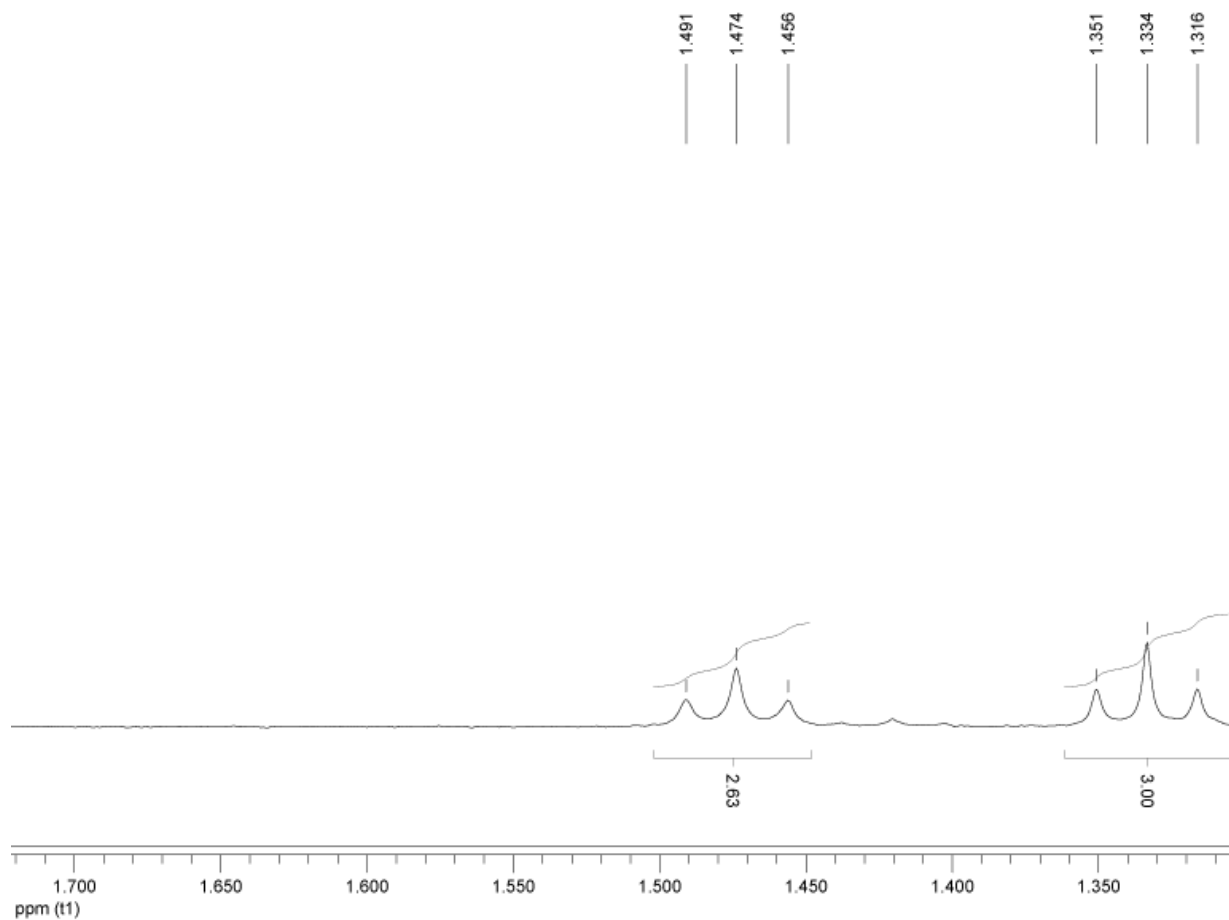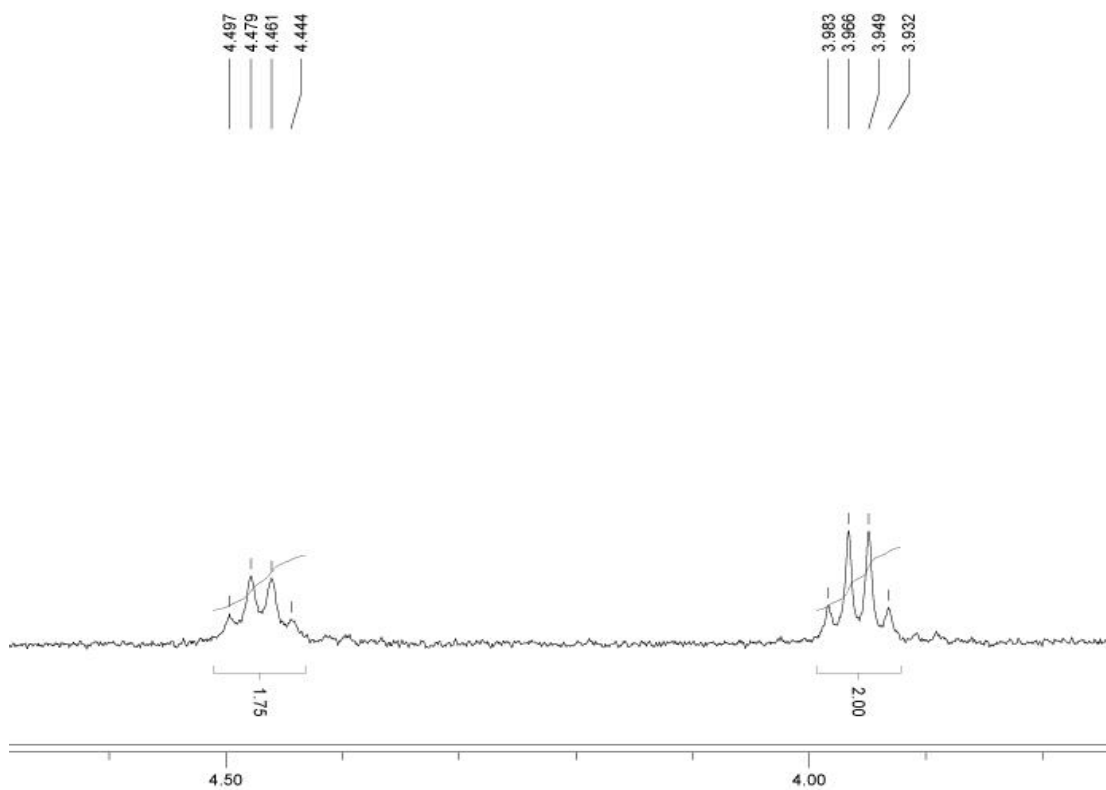

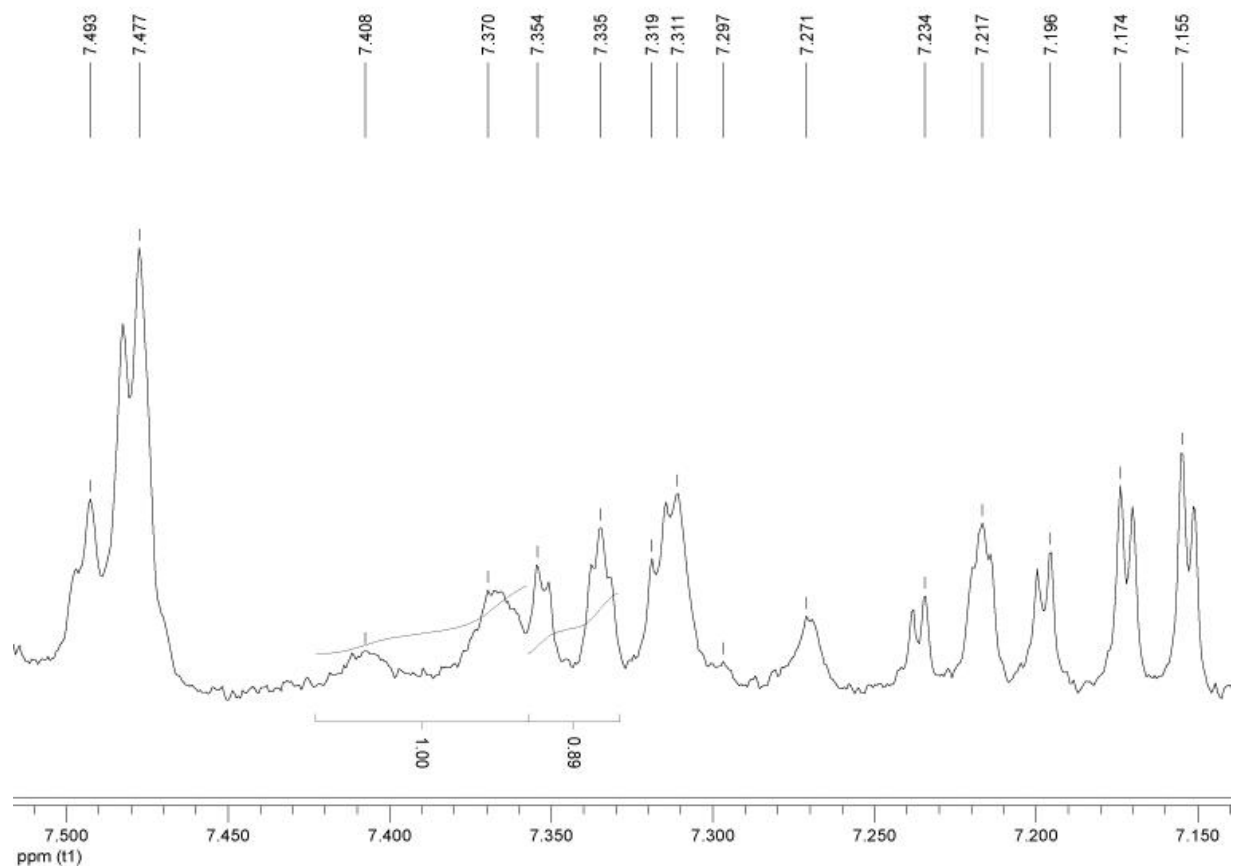

**Fig. S2.**  $^1\text{H}$  NMR spectra of **6** measured 6 h later.

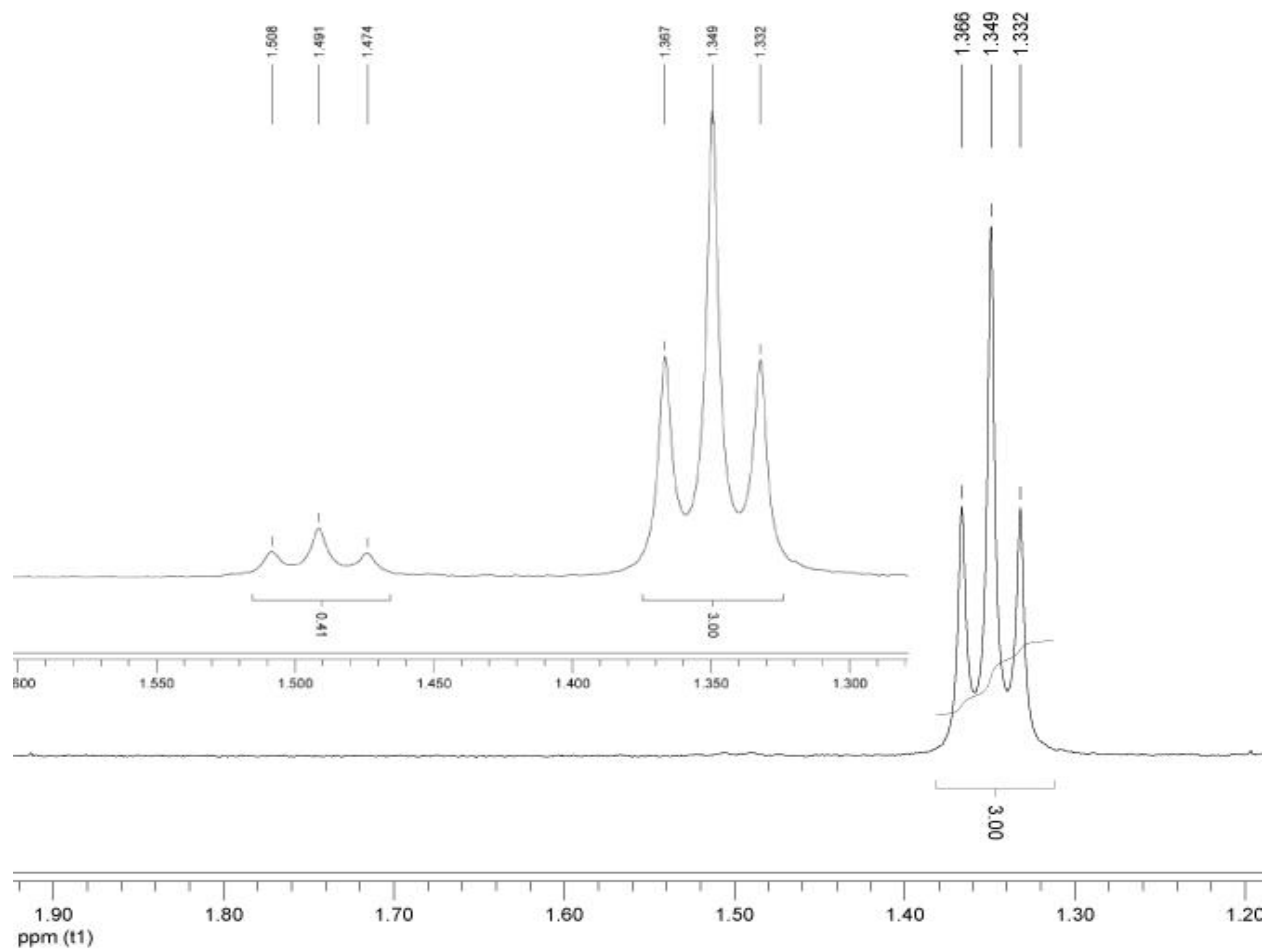

**Fig. S3.** <sup>1</sup>H NMR spectra of **2** measured immediately after its dissolution in *d*<sub>6</sub>-DMSO, inset: measured 6 h later.

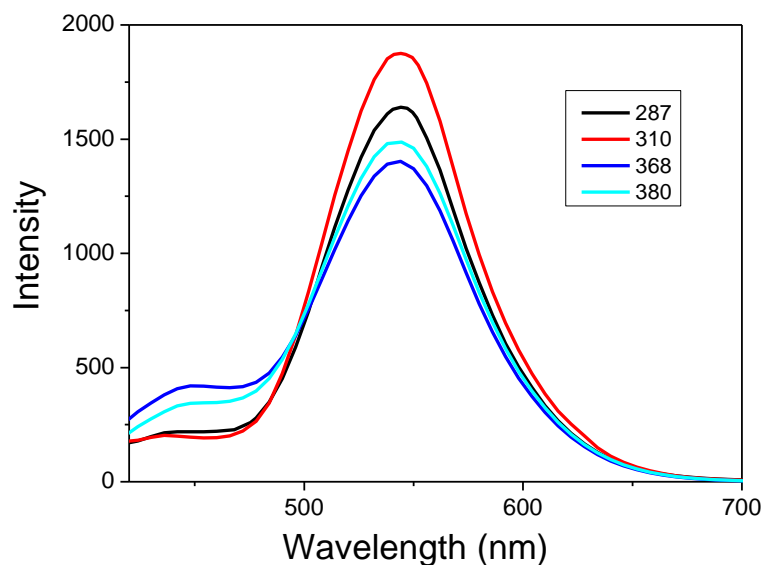

(a)

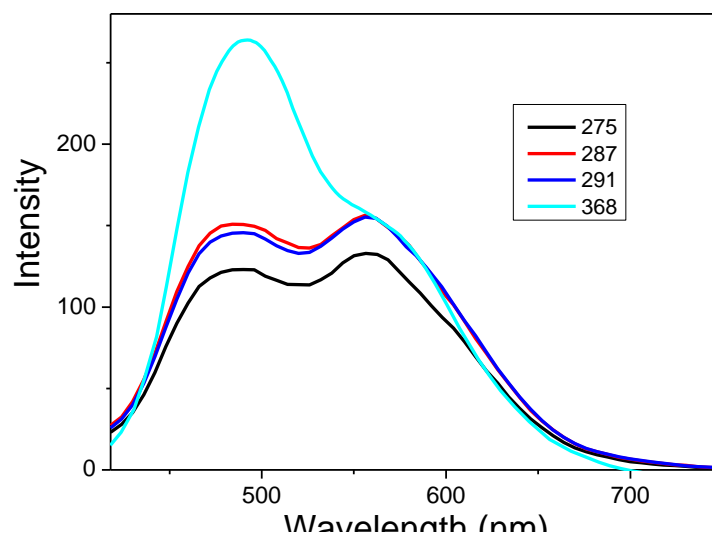

(b)

**Fig. S4** Fluorescence emission spectra of **L** in THF (a) and DMF (b), inset: the excitation wavelengths.



Table S1. Crystallographic Data for complexes 1–6.

|                                                   | 1                                                                                               | 2                                                                                               | 3                                                                                               | 4                                                                                               | 5                                                                                               | 6                                                                 |
|---------------------------------------------------|-------------------------------------------------------------------------------------------------|-------------------------------------------------------------------------------------------------|-------------------------------------------------------------------------------------------------|-------------------------------------------------------------------------------------------------|-------------------------------------------------------------------------------------------------|-------------------------------------------------------------------|
| Formula                                           | C <sub>75</sub> H <sub>58</sub> Cl <sub>4</sub> N <sub>8</sub> O <sub>8</sub> S <sub>2</sub> Cd | C <sub>75</sub> H <sub>58</sub> Cl <sub>4</sub> N <sub>8</sub> O <sub>8</sub> S <sub>2</sub> Zn | C <sub>74</sub> H <sub>56</sub> Cl <sub>2</sub> N <sub>8</sub> O <sub>8</sub> S <sub>2</sub> Co | C <sub>75</sub> H <sub>58</sub> Cl <sub>4</sub> N <sub>8</sub> O <sub>8</sub> S <sub>2</sub> Cu | C <sub>75</sub> H <sub>58</sub> Cl <sub>4</sub> N <sub>8</sub> O <sub>8</sub> S <sub>2</sub> Mn | C <sub>37</sub> H <sub>28</sub> N <sub>4</sub> I <sub>2</sub> SCd |
| Formula Wt                                        | 1517.65                                                                                         | 1470.58                                                                                         | 1379.23                                                                                         | 1468.75                                                                                         | 1460.16                                                                                         | 926.89                                                            |
| Crystal Syst                                      | Triclinic                                                                                       | Triclinic                                                                                       | Triclinic                                                                                       | Triclinic                                                                                       | Triclinic                                                                                       | Monoclinic                                                        |
| Space group                                       | <i>P</i> $\bar{1}$                                                                              | <i>C</i> 2/ <i>c</i>                                              |
| <i>a</i> (Å)                                      | 14.071(5)                                                                                       | 13.9221(3)                                                                                      | 11.0672(7)                                                                                      | 13.8465(4)                                                                                      | 14.0610(3)                                                                                      | 19.953(5)                                                         |
| <i>b</i> (Å)                                      | 14.174(5)                                                                                       | 14.1176(3)                                                                                      | 15.9039(9)                                                                                      | 14.0872(4)                                                                                      | 14.1018(3)                                                                                      | 13.943(5)                                                         |
| <i>c</i> (Å)                                      | 19.754(5)                                                                                       | 20.0140(4)                                                                                      | 19.6022(12)                                                                                     | 20.0791(9)                                                                                      | 19.9266(7)                                                                                      | 27.347(5)                                                         |
| <i>a</i> (°)                                      | 97.391(5)                                                                                       | 105.3220(10)                                                                                    | 105.422(4)                                                                                      | 105.473(3)                                                                                      | 104.860(2)                                                                                      | 90.000(5)                                                         |
| <i>β</i> (°)                                      | 103.966(5)                                                                                      | 97.9320(10)                                                                                     | 100.550(4)                                                                                      | 98.160(3)                                                                                       | 97.678(2)                                                                                       | 106.629(5)                                                        |
| <i>γ</i> (°)                                      | 113.288(5)                                                                                      | 112.5160(10)                                                                                    | 94.827(4)                                                                                       | 112.461(2)                                                                                      | 112.8040(10)                                                                                    | 90.000(5)                                                         |
| <i>V</i> [Å <sup>3</sup> ]                        | 3399.1(19)                                                                                      | 3376.01(12)                                                                                     | 3237.5(3)                                                                                       | 3355.0(2)                                                                                       | 3397.99(16)                                                                                     | 7290(3)                                                           |
| <i>Z</i>                                          | 2                                                                                               | 2                                                                                               | 2                                                                                               | 2                                                                                               | 4                                                                                               | 4                                                                 |
| <i>D</i> <sub>c</sub> [g·cm <sup>-3</sup> ]       | 1.453                                                                                           | 1.447                                                                                           | 1.417                                                                                           | 1.454                                                                                           | 1.427                                                                                           | 1.689                                                             |
| <i>F</i> (000)                                    | 1528                                                                                            | 1516                                                                                            | 1430                                                                                            | 1514                                                                                            | 1506                                                                                            | 3584                                                              |
| Crystal Size (mm)                                 | 0.50 × 0.30 × 0.20                                                                              | 0.34 × 0.18 × 0.10                                                                              | 0.44 × 0.14 × 0.05                                                                              | 0.40 × 0.21 × 0.06                                                                              | 0.50 × 0.22 × 0.20                                                                              | 0.16 × 0.11 × 0.04                                                |
| Temperature (K)                                   | 298(2)                                                                                          | 296(2)                                                                                          | 296(2)                                                                                          | 296(2)                                                                                          | 296(2)                                                                                          | 298(2)                                                            |
| Radiation [Å] MoK $\alpha$                        | 0.71069                                                                                         | 0.71073                                                                                         | 0.71073                                                                                         | 0.71073                                                                                         | 0.71073                                                                                         | 0.71069                                                           |
| <i>N</i> <sub>ref</sub> , <i>N</i> <sub>par</sub> | 15486, 885                                                                                      | 15371, 883                                                                                      | 14843, 856                                                                                      | 15439, 883                                                                                      | 15562, 883                                                                                      | 8087, 407                                                         |
| <i>R</i> <sub>1</sub> , <i>wR</i> <sub>2</sub>    | 0.0752, 0.1787                                                                                  | 0.0667, 0.1865                                                                                  | 0.0801, 0.1881                                                                                  | 0.0716, 0.1896                                                                                  | 0.0723, 0.2106                                                                                  | 0.0878, 0.2230                                                    |
| Goodness-of-fit on <i>F</i> <sup>2</sup>          | 1.008                                                                                           | 1.046                                                                                           | 1.016                                                                                           | 1.050                                                                                           | 1.060                                                                                           | 1.025                                                             |

Table S2. Selected bond lengths [Å] and angles [°] for 1–6.

| 1            | 2        | 3         | 4          | 5         | 6         |           |           |           |           |           |           |
|--------------|----------|-----------|------------|-----------|-----------|-----------|-----------|-----------|-----------|-----------|-----------|
| Bond lengths |          |           |            |           |           |           |           |           |           |           |           |
| Cd1–N1       | 2.286(5) | Zn1–N1    | 2.082(3)   | Co1–N1    | 2.057(4)  | Cu1–N1    | 2.234(4)  | Mn1–N1    | 2.271(3)  | Cd1–N2    | 2.331(10) |
| Cd1–N2       | 2.328(6) | Zn1–N2    | 2.185(3)   | Co1–N2    | 1.891(4)  | Cu1–N2    | 2.002(3)  | Mn1–N2    | 2.188(3)  | Cd1–N1    | 2.347(11) |
| Cd1–N3       | 2.350(6) | Zn1–N3    | 2.186(3)   | Co1–N3    | 2.059(4)  | Cu1–N3    | 2.240(4)  | Mn1–N3    | 2.247(3)  | Cd1–N3    | 2.379(11) |
| Cd1–N4       | 2.367(6) | Zn1–N4    | 2.216(3)   | Co1–N4    | 2.103(4)  | Cu1–N4    | 2.141(3)  | Mn1–N4    | 2.248(3)  | Cd1–I2    | 2.724(16) |
| Cd1–N5       | 2.289(5) | Zn1–N5    | 2.076(3)   | Co1–N5    | 1.908(4)  | Cu1–N5    | 1.959(3)  | Mn1–N5    | 2.254(3)  | Cd1–I1    | 2.741(17) |
| Cd1–N6       | 2.338(7) | Zn1–N6    | 2.201(3)   | Co1–N6    | 2.108(4)  | Cu1–N6    | 2.128(4)  | Mn1–N6    | 2.194(3)  |           |           |
| Bond angles  |          |           |            |           |           |           |           |           |           |           |           |
| N1–Cd1–N2    | 70.0(2)  | N1–Zn1–N2 | 74.85(11)  | N1–Co1–N2 | 79.92(15) | N1–Cu1–N2 | 76.62(13) | N1–Mn1–N2 | 71.80(10) | N2–Cd1–N1 | 69.2(3)   |
| N5–Cd1–N6    | 70.4(2)  | N5–Zn1–N6 | 106.28(11) | N5–Co1–N6 | 79.41(16) | N5–Cu1–N6 | 78.47(13) | N5–Mn1–N6 | 72.50(11) | N2–Cd1–N3 | 68.9(4)   |
| N1–Cd1–N3    | 69.9(2)  | N2–Zn1–N3 | 150.18(11) | N2–Co1–N3 | 80.12(15) | N2–Cu1–N3 | 76.11(12) | N2–Mn1–N3 | 72.50(10) | N1–Cd1–I2 | 99.3(3)   |
| N5–Cd1–N4    | 69.9(2)  | N5–Zn1–N4 | 74.94(11)  | N5–Co1–N4 | 79.06(16) | N5–Cu1–N4 | 77.62(12) | N5–Mn1–N4 | 72.04(11) | N3–Cd1–I1 | 101.8(3)  |

Table S3. Non-covalent interactions in the chromophores **1–5**.

| 1              | 2     |                      | 3     |                      | 4     |                      | 5     |                       |       |
|----------------|-------|----------------------|-------|----------------------|-------|----------------------|-------|-----------------------|-------|
| H-bond         |       |                      |       |                      |       |                      |       |                       |       |
| O2...H36-C36   | 2.668 | O1...H17-C17         | 2.426 | O1...H46-C46         | 2.405 | O1...H46-C46         | 2.520 | O1...H73B-C73         | 2.630 |
| O3...H9-C9     | 2.481 | O1...H73-C73         | 2.526 | O2...H36B-C36        | 2.608 | O1...H49-C49         | 2.452 | O2...H9-C9            | 2.531 |
| O3...H12-C12   | 2.455 | O3...H46-C46         | 2.446 | O3...H49-C49         | 2.641 | O1...H58-C58         | 2.709 | O2...H12-C12          | 2.449 |
| O3...H19-C19   | 2.463 | O3...H49-C49         | 2.425 | O5...H21-C21         | 2.476 | O2...H12-C12         | 2.705 | O2...H21-C21          | 2.525 |
| O4...H38-C38   | 2.701 | O3...H54-C54         | 2.569 | O5...H38-C38         | 2.493 | O4...H1-C1           | 2.493 | O3...H36B-C36         | 2.407 |
| O5...H36-C36   | 2.642 | O4...H3-C3           | 2.652 | O6...H18-C18         | 2.563 | O5...H36B-C36        | 2.422 | O3...H52-C52          | 2.510 |
| O5...H40-C40   | 2.690 | O4...H36-C36         | 2.628 | O6...H73-C73         | 2.575 | O5...H38-C38         | 2.521 | O5...H14-C14          | 2.706 |
| O8...H3-C3     | 2.708 | O6...H51-C51         | 2.702 | O7...H14-C14         | 2.715 | O7...H4-C4           | 2.419 | O6...H41-C41          | 2.419 |
| O8...H59B-C59  | 2.621 | O7...H9-C9           | 2.516 | O7...H38-C38         | 2.664 | O7...H7-C7           | 2.401 | O6...H44-C44          | 2.474 |
| O10...H1-C1    | 2.443 | O7...H12-C12         | 2.439 | O8...H12-C12         | 2.639 | O7...H17-C17         | 2.563 | O6...H54-C54          | 2.519 |
| O10...H73B-C73 | 2.439 | O7...H21-C21         | 2.626 | O8...H13-C13         | 2.491 | O8...H40-C40         | 2.711 | O7...H15-C15          | 2.582 |
| O11...H30-C30  | 2.613 | O8...H52-C52         | 2.488 |                      |       | O8...H73B-C73        | 2.613 |                       |       |
| O11...H33-C33  | 2.516 | O8...H62-C62         | 2.709 |                      |       |                      |       | <i>Cl2S...H52-C52</i> | 2.922 |
| O11...H39-C39  | 2.476 | <i>O5...HISA-CIS</i> | 2.499 | <i>S1...H44A-C44</i> | 2.908 | <i>O2...HIS1-CIS</i> | 2.441 | <i>O8...HISA-CIS</i>  | 2.640 |
| C-H... $\pi$   |       |                      |       |                      |       |                      |       |                       |       |
| a              | 2.810 | a                    | 2.756 | a                    | 2.818 | a                    | 2.777 | a                     | 2.772 |
